# Supplementary material for: Regulating oxygen functionalities of cellulose-derived hard carbon toward superior sodium storage
Source: Royal Society of Chemistry journal article supplement (doi:10.1039/d3ta07775f), 2024-01-01
Supplement: d3ta07775f1.pdf [file d3ta07775f1.pdf]

## Supporting information

### **Regulating oxygen functionalities of cellulose-derived hard carbon toward superior sodium storage**

Boyang Zhao<sup>a</sup>, Xiaotian Li<sup>a</sup>, Lei Shang<sup>a</sup>, Chuang Qiu<sup>a</sup>, Renlu Yuan<sup>a</sup>, Haiyan Liu<sup>b</sup>, Tao Liu<sup>b</sup>, Ang Li<sup>a</sup>, Xiaohong Chen<sup>a</sup>, Huaihe Song<sup>a\*</sup>

*a. State Key Laboratory of Chemical Resource Engineering, Beijing Key Laboratory of Electrochemical Process and Technology, Beijing University of Chemical Technology, Beijing 100029, China*

*b. National Engineering Research Center of Coal Gasification and Coal-Based Advanced Materials, Shandong Energy Group CO, LTD, Jinan, China*

*\*Corresponding author.*

*Email addresses: songhh@mail.buct.edu.cn (H. Song)*

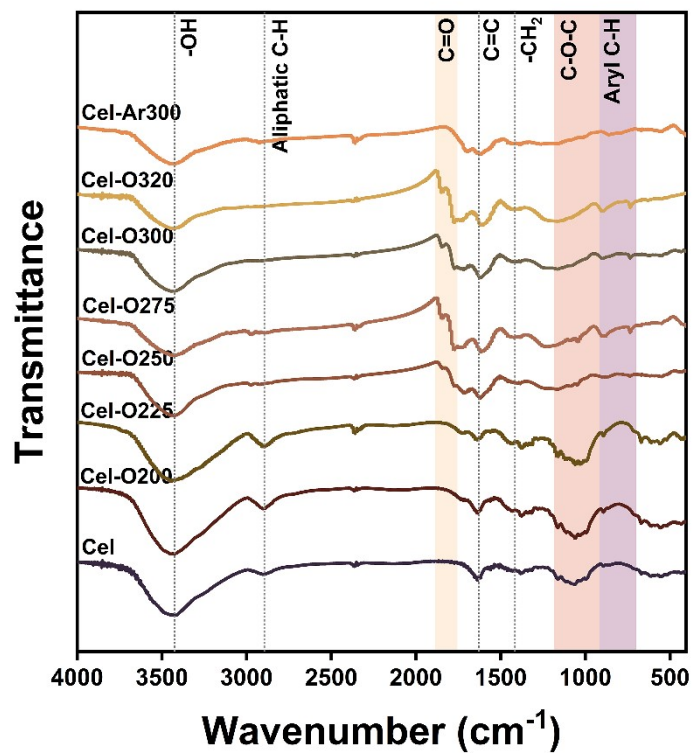

Fig. S1. FTIR spectra of Cel-Ox.

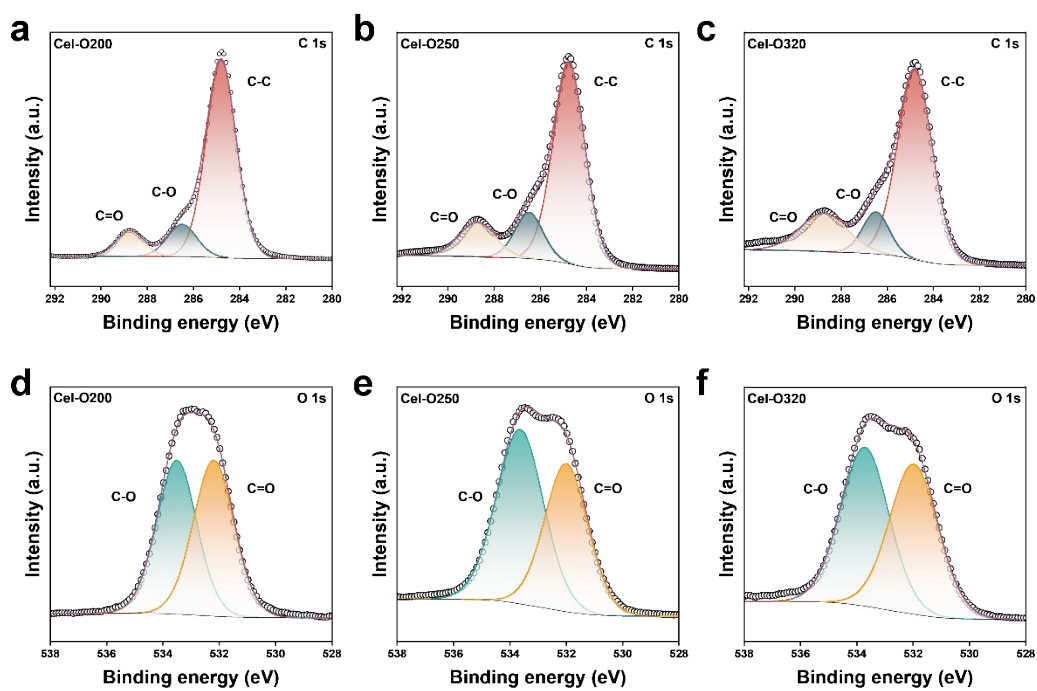

Fig. S2. High resolution C 1s and O 1s spectra of Cel-O200, Cel-O250, and Cel-O320.

Table S1. The content of the C 1s and O 1s peaks in Cel-Ox.

| B.E. (eV)  | C1 (284.80) | C2 (286.49) | C3 (284.75) | O1 (531.98) | O2 (533.51) |
|------------|-------------|-------------|-------------|-------------|-------------|
| Assignment | C–C         | C–O         | C=O         | C=O         | C–O         |
| Cel-O200   | 78.41       | 12.41       | 9.81        | 49.22       | 50.78       |
| Cel-O250   | 71.55       | 14.53       | 13.92       | 56.11       | 43.89       |
| Cel-O300   | 77.13       | 13.49       | 9.83        | 57.13       | 42.87       |
| Cel-O320   | 69.45       | 11.75       | 18.80       | 51.13       | 48.87       |
| Cel-Ar300  | 79.07       | 14.43       | 6.50        | 46.10       | 53.90       |

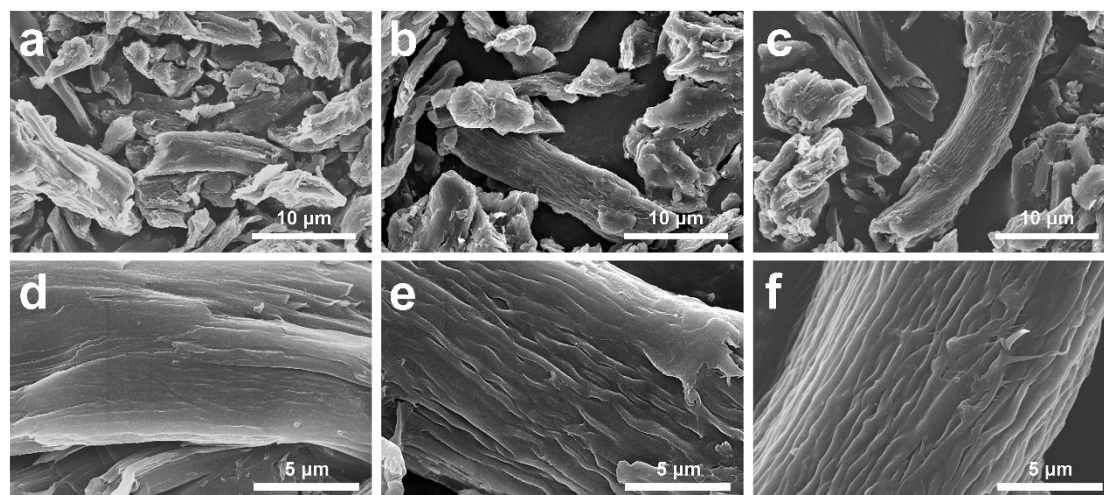

Fig. S3. SEM images of (a, d) Cel-O200-1500, (b, e) Cel-O250-1500, (c, f) Cel-O320-1500.

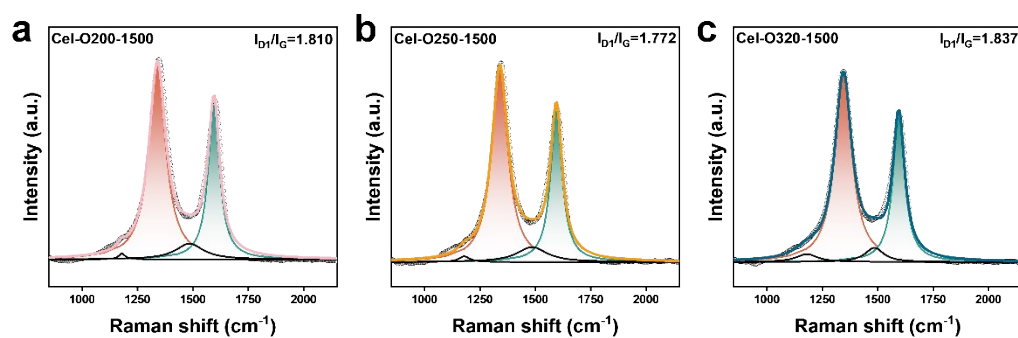

Fig. S4. Raman spectra of Cel-O200-1500, Cel-O250-1500, Cel-O320-1500.

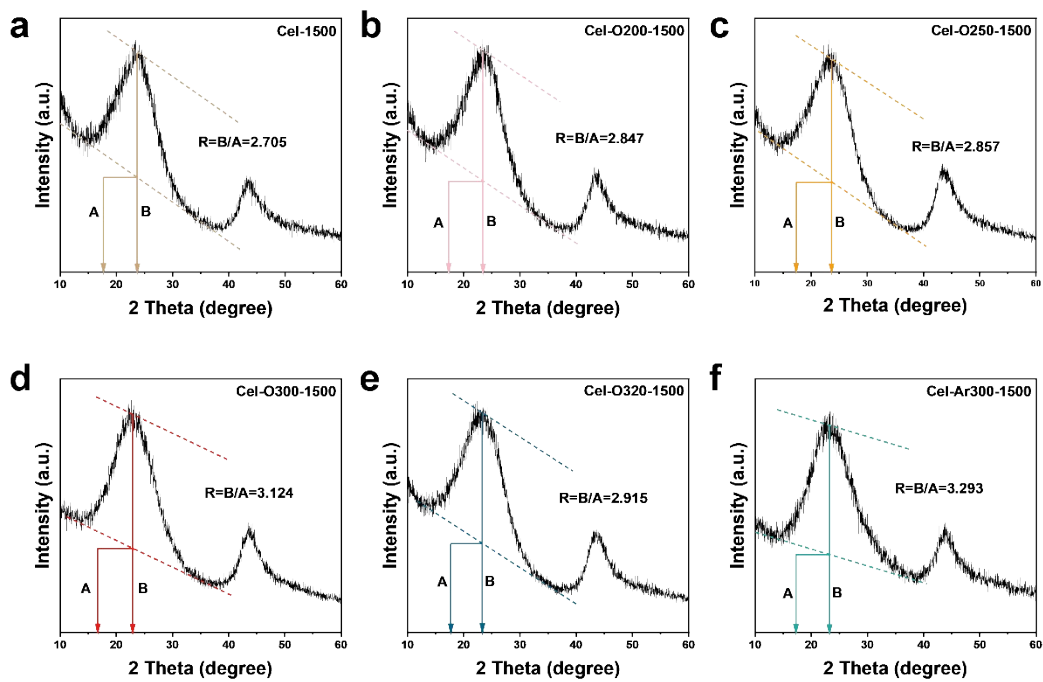

Fig. S5. Calculation of R values of Cel-1500, Cel-Ox-1500, and Cel-Ar300-1500.

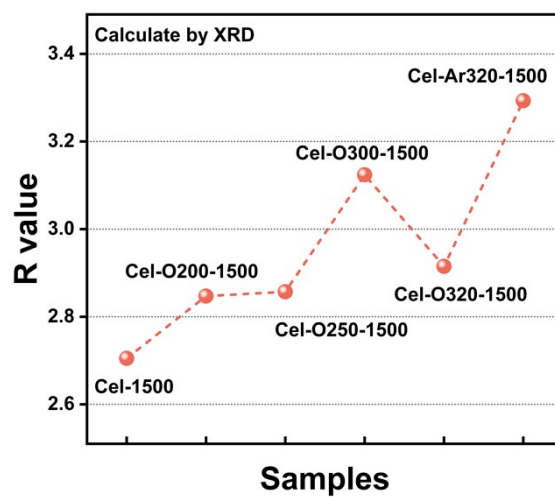

Fig. S6. The variation pattern of R values.

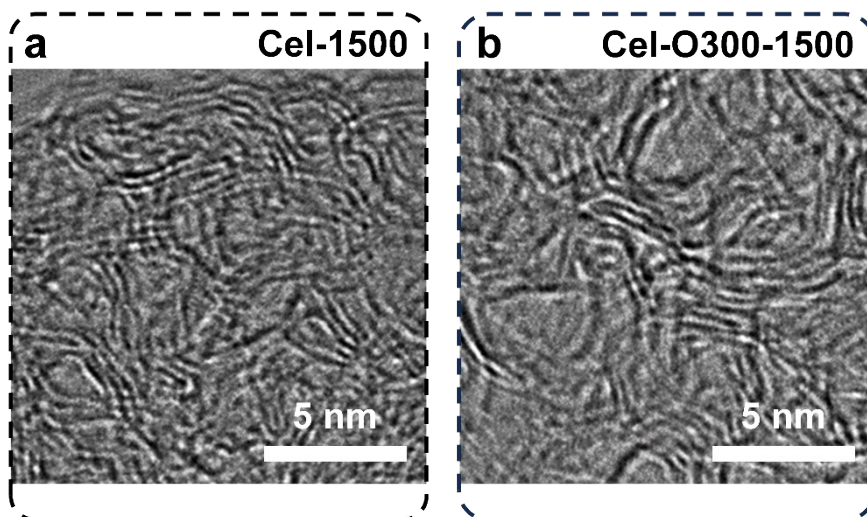

Fig. S7. HRTEM images of Cel-1500 and Cel-O300-1500.

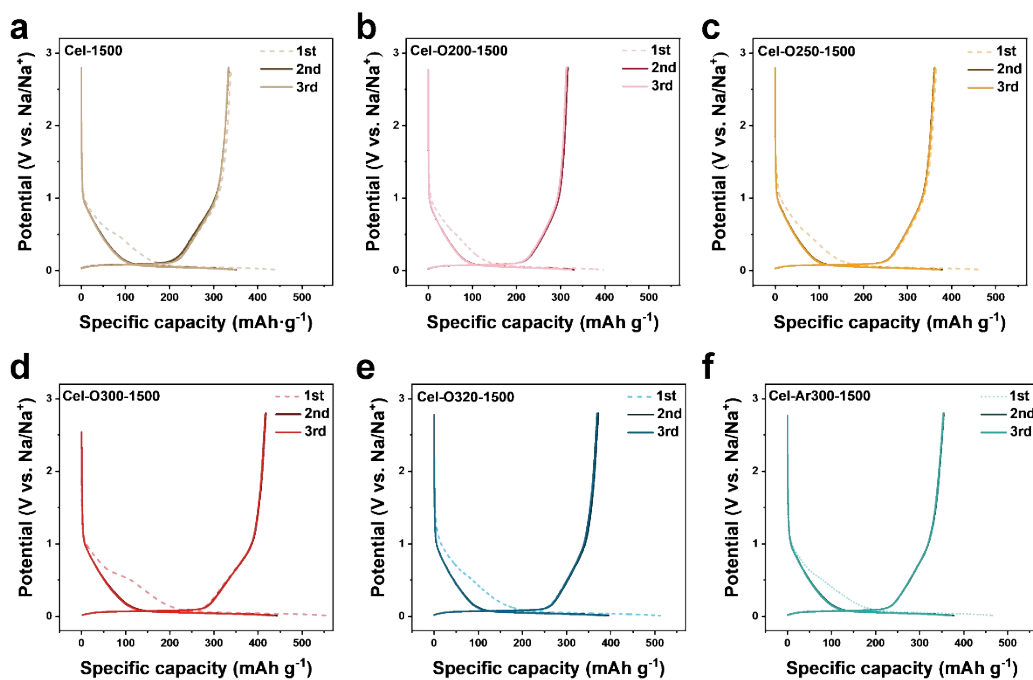

Fig. S8. GCD profiles of Cel-1500, Cel-Ox-1500 and Cel-Ar300-1500 during the initial three cycles.

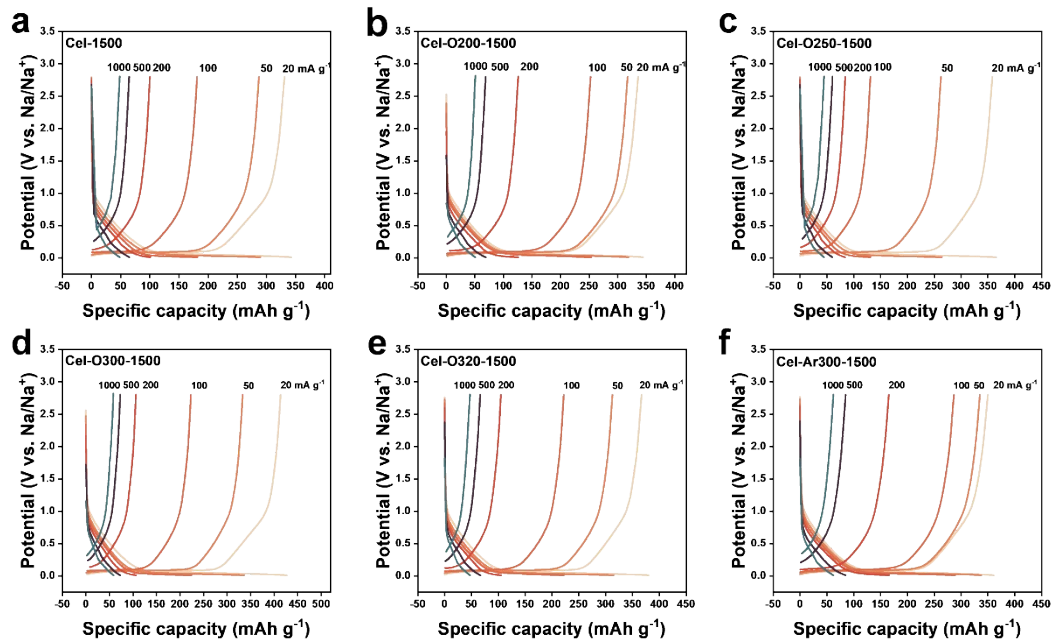

Fig. S9. GCD profiles of Cel-1500, Cel-Ox-1500 and Cel-Ar300-1500 at different current density in SIBs.

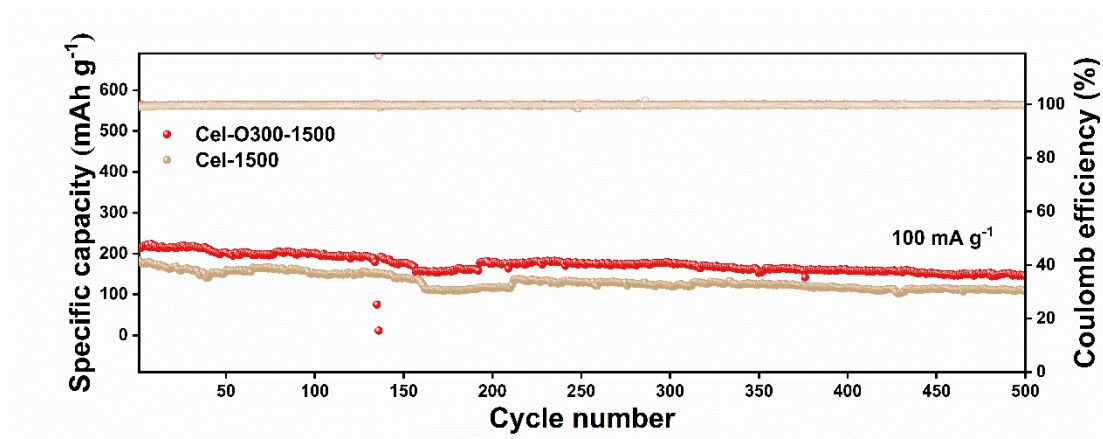

Fig. S10. long-term cycling performance and coulombic efficiency at 100 mA g<sup>-1</sup> of Cel-O300-1500 and Cel-1500.

Table S2. The electrochemical performance and plateau capacity ratio of cellulose-derived hard carbon samples measured at 20 mA g<sup>-1</sup>.

| Samples        | Reversible Capacity<br>(mAh g <sup>-1</sup> ) | ICE<br>(%) | Plateau Capacity<br>(mAh g <sup>-1</sup> ) | The proportion of<br>the Plateau capacity |
|----------------|-----------------------------------------------|------------|--------------------------------------------|-------------------------------------------|
| Cel-1500       | 342.5                                         | 76.6       | 235.2                                      | 0.687                                     |
| Cel-O200-1500  | 344.4                                         | 71.9       | 238.8                                      | 0.693                                     |
| Cel-O250-1500  | 365.6                                         | 77.9       | 262.8                                      | 0.719                                     |
| Cel-O300-1500  | 426.8                                         | 74.8       | 307.5                                      | 0.721                                     |
| Cel-O320-1500  | 380.2                                         | 72.4       | 275.5                                      | 0.725                                     |
| Cel-Ar300-1500 | 361.0                                         | 75.6       | 246.1                                      | 0.682                                     |

Table S3. Kinetic fitting parameters and calculated D according to EIS test.

| Samples        | Re ( $\Omega$ ) | Rf ( $\Omega$ ) | Rct ( $\Omega$ ) | $\sigma$ ( $\Omega$ s <sup>-1/2</sup> ) | D (cm <sup>2</sup> s <sup>-1</sup> ) |
|----------------|-----------------|-----------------|------------------|-----------------------------------------|--------------------------------------|
| Cel-1500       | 4.886           | 5.824           | 76.81            | 933.33                                  | 3.18478E-12                          |
| Cel-Ar300-1500 | 6.102           | 4.831           | 33.44            | 782.91                                  | 4.52612E-12                          |
| Cel-O300-1500  | 4.836           | 2.143           | 41.07            | 1135.99                                 | 2.14982E-12                          |

Table S4. Summary of reported pre-oxidation-related and cellulose-derived hard carbon anodes for SIBs.

| Samples                         | Pyrolysis<br>temperature<br>(°C) | S <sub>BET</sub><br>(m <sup>2</sup> g <sup>-1</sup> ) | d (002)<br>(nm) | Reversible<br>capacity (mAh g <sup>-1</sup> ) | ICE (%) | Ref. |
|---------------------------------|----------------------------------|-------------------------------------------------------|-----------------|-----------------------------------------------|---------|------|
| Phenolic Resin<br>(PFHC-20)     | 1100                             | 35.3                                                  | 0.389           | 334.3<br>(20 mA g <sup>-1</sup> )             | 84.7    | 1    |
| Bituminous coal<br>(RC-GO-1200) | 1200                             | 8.4                                                   | 0.380           | 274.2<br>(30 mA g <sup>-1</sup> )             | 74.8    | 2    |

|                                                         |      |       |       |                                     |      |    |
|---------------------------------------------------------|------|-------|-------|-------------------------------------|------|----|
| Esterified starch<br>(H300-1100)                        | 1100 | 2.9   | 0.387 | 369.8<br>(20 mA g <sup>-1</sup> )   | 82.5 | 3  |
| D-glucose<br>powder<br>(G-220-1300)                     | 1300 | 6.0   | 0.364 | 308.0<br>(25 mA g <sup>-1</sup> )   | 84.0 | 4  |
| Asphalt<br>(HC-325-9)                                   | 1100 | 367.9 | 0.389 | 286.9<br>(10 mA g <sup>-1</sup> )   | 83.6 | 5  |
| Cotton                                                  | 1300 | 38.0  | 0.410 | 260.0<br>(20 mA g <sup>-1</sup> )   | 72.0 | 6  |
| Cellulose<br>nanofibers                                 | 1000 | 377.0 | —     | 255.0<br>(40 mA g <sup>-1</sup> )   | 58.8 | 7  |
| Microcrystalline<br>cellulose                           | 1600 | <10   | 0.376 | 310.0<br>(37.2 mA g <sup>-1</sup> ) | 84.0 | 8  |
| Filter paper<br>(DPC-A)                                 | 800  | 761.0 | —     | 289.0<br>(20 mA g <sup>-1</sup> )   | 81.0 | 9  |
| Nanocellulose<br>(Spinifex<br>derived)                  | 1000 | 154.0 | 0.390 | 386.0<br>(20 mA g <sup>-1</sup> )   | 50.0 | 10 |
| Cellulose<br>nanocrystals<br>(CNCs)                     | 1000 | 145.6 | 0.390 | 340.0<br>(100 mA g <sup>-1</sup> )  | —    | 11 |
| Microcrystalline<br>cellulose                           | 1400 | 5.0   | 0.373 | 310.0<br>(37.2 mA g <sup>-1</sup> ) | 82.7 | 12 |
| Cellulose powder<br>derived from<br>cotton linter       | 1300 | 506.0 | 0.389 | 351.0<br>(25 mA g <sup>-1</sup> )   | 68.0 | 13 |
| Filter Paper<br>(MV-HC)                                 | 1100 | 379.0 | —     | 308.0<br>(20 mA g <sup>-1</sup> )   | 68.0 | 14 |
| Microcrystalline<br>cellulose<br>(BHC-CO <sub>2</sub> ) | 1000 | 96.0  | 0.350 | 293.5<br>(50 mA g <sup>-1</sup> )   | 39.5 | 15 |
| Nanocellulose<br>powder                                 | 1200 | —     | —     | 250.0<br>(100 mA g <sup>-1</sup> )  | —    | 16 |
| Microcrystalline<br>cellulose<br>(HC-88.5)              | 1300 | 281.8 | 0.404 | 322.0<br>(50 mA g <sup>-1</sup> )   | —    | 17 |
| Microcrystalline<br>cellulose<br>(MCC-1400)             | 1400 | 5.8   | 0.388 | 343.3<br>(20 mA · g <sup>-1</sup> ) | 87.3 | 18 |
| Cellulose fiber<br>(HC-Cell)                            | 1300 | 5.1   | 0.381 | 332.0<br>(0.2 C)                    | 83.0 | 19 |
| cellulose and<br>lignin mixed at<br>amass ratio of      | 1400 | 53.0  | 0.384 | 259.0<br>(100 mA g <sup>-1</sup> )  | —    | 20 |



|                                                          |             |            |              |                                         |             |                      |
|----------------------------------------------------------|-------------|------------|--------------|-----------------------------------------|-------------|----------------------|
| 1:1 (CL-HC)                                              |             |            |              |                                         |             |                      |
| bacterial<br>cellulose<br>(T-SBC-1300)                   | 1300        | 51.2       | 0.390        | 239.0<br>(30 mA g <sup>-1</sup> )       | 56.9        | <sup>21</sup>        |
| <b><math>\alpha</math>-cellulose<br/>(Cel-O300-1500)</b> | <b>1500</b> | <b>8.7</b> | <b>0.383</b> | <b>426.8<br/>(20 mA g<sup>-1</sup>)</b> | <b>74.8</b> | <b>This<br/>work</b> |

---

## Reference

- 1 G. Zhang, L. Zhang, Q. Ren, L. Yan, F. Zhang, W. Lv and Z. Shi, *ACS Appl. Mater. Interfaces*, 2021, **13**, 31650–31659.
- 2 Z. Lou, H. Wang, D. Wu, F. Sun, J. Gao, X. Lai and G. Zhao, *Fuel*, 2022, **310**, 122072.
- 3 M. Song, Z. Yi, R. Xu, J. Chen, J. Cheng, Z. Wang, Q. Liu, Q. Guo, L. Xie and C. Chen, *Energy Storage Materials*, 2022, **51**, 620–629.
- 4 Z. V. Bobyleva, O. A. Drozhzhin, A. M. Alekseeva, K. A. Dosaev, G. S. Peters, G. P. Lakienko, T. I. Perfil'yeva, N. A. Sobolev, K. I. Maslakov, S. V. Savilov, A. M. Abakumov and E. V. Antipov, *ACS Appl. Energy Mater.*, 2023, **6**, 181–190.
- 5 R. Xu, Z. Yi, M. Song, J. Chen, X. Wei, F. Su, L. Dai, G. Sun, F. Yang, L. Xie and C.-M. Chen, *Carbon*, 2023, **206**, 94–104.
- 6 Y. Li, Y.-S. Hu, M.-M. Titirici, L. Chen and X. Huang, *Adv. Energy Mater.*, 2016, **6**, 1600659.
- 7 W. Luo, J. Schardt, C. Bommier, B. Wang, J. Razink, J. Simonsen and X. Ji, *J. Mater. Chem. A*, 2013, **1**, 10662.
- 8 V. Simone, A. Boulineau, A. de Geyer, D. Rouchon, L. Simonin and S. Martinet, *Journal of Energy Chemistry*, 2016, **25**, 761–768.
- 9 P. Zheng, T. Liu and S. Guo, *Sci Rep*, 2016, **6**, 35620.
- 10 R. R. Gaddam, E. Jiang, N. Amiralian, P. K. Annamalai, D. J. Martin, N. A. Kumar and X. S. Zhao, *Sustainable Energy Fuels*, 2017, **1**, 1090–1097.
- 11 H. Zhu, F. Shen, W. Luo, S. Zhu, M. Zhao, B. Natarajan, J. Dai, L. Zhou, X. Ji, R. S. Yassar, T. Li and L. Hu, *Nano Energy*, 2017, **33**, 37–44.
- 12 C. M. Ghimbeu, *Nano Energy*.
- 13 H. Yamamoto, S. Muratsubaki, K. Kubota, M. Fukunishi, H. Watanabe, J. Kim and S. Komaba, *J. Mater. Chem. A*, 2018, **6**, 16844–16848.
- 14 Z. Li, Y. Chen, Z. Jian, H. Jiang, J. J. Razink, W. F. Stickle, J. C. Neuefeind and X. Ji, *Chem. Mater.*, 2018, **30**, 4536–4542.
- 15 H. Wang, F. Sun, Z. Qu, K. Wang, L. Wang, X. Pi, J. Gao and G. Zhao, *ACS Sustainable Chem. Eng.*, 2019, **7**, 18554–18565.
- 16 L. Li, D. Chen, S. Su and B. Zeng, *mat express*, 2020, **10**, 1685–1691.
- 17 S. Alvin, C. Chandra and J. Kim, *Chemical Engineering Journal*, 2021, **411**, 128490.
- 18 X.-S. Wu, X.-L. Dong, B.-Y. Wang, J.-L. Xia and W.-C. Li, *Renewable Energy*, 2022, **189**, 630–638.
- 19 J. Conder, C. Villevieille, J.-M. Le Meins and C. Matei Ghimbeu, *ACS Appl. Energy Mater.*, 2022, **5**, 12373–12387.
- 20 Q. Jin, L. Tao, Y. Feng, D. Xia, G. A. Spiering, A. Hu, R. Moore, F. Lin and H. Huang, *ACS Sustainable Chem. Eng.*, 2023, **11**, 536–546.
- 21 F. Wang, T. Zhang and F. Ran, *Electrochimica Acta*, 2023, **441**, 141770.
